# Supplementary material
Source: publisher site journal article supplement (https://www.dovepress.com/article/363429)
Supplement: Supplementary file 1 [file get_supplementary_file.php]

**
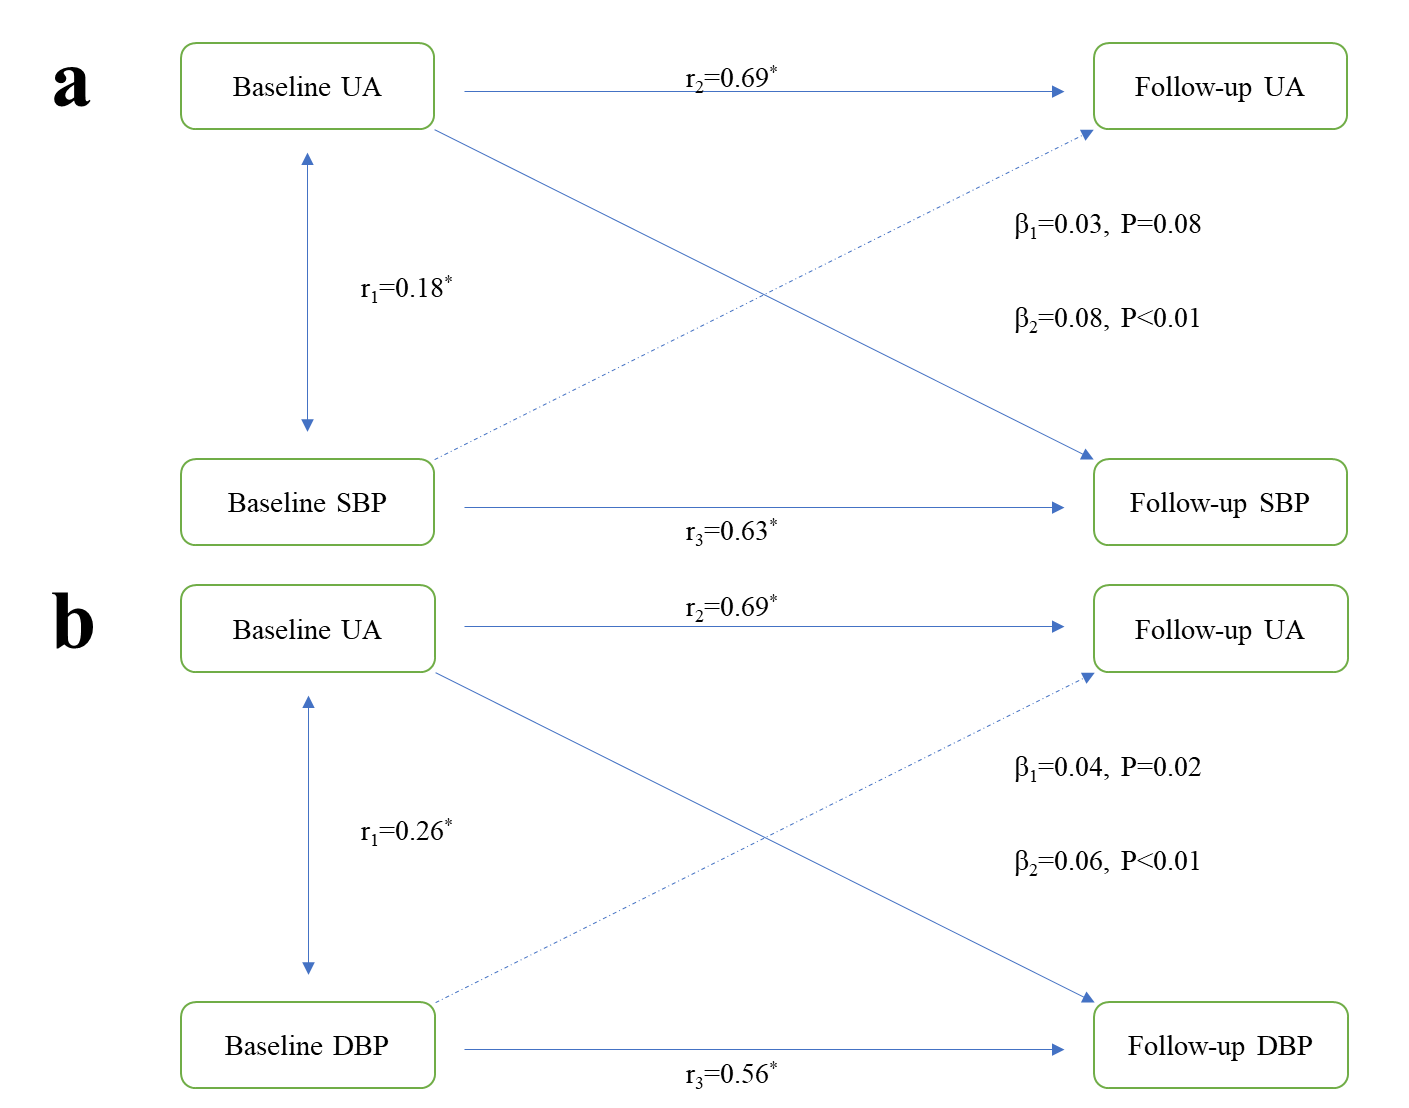
Supplementary Figure 1.** An illustration of the cross-lagged panel analysis models for the temporal associations of SBP (a) and DBP (b) with serum UA, adjusting for age, sex, education level, cigarette smoking, alcohol consumption, low-density lipoprotein, high-density lipoprotein, and fasting glucose. All values were standardized with Z-transformation. β1 and β2 indicate cross-lagged path coefficients. r1 indicates a synchronous correlation. r2 and r3 indicate tracking correlations. UA: uric acid, SBP: systolic blood pressure, DBP: diastolic blood pressure, **P* < 0.05.
